# Supplementary material for: A 40-Year Cohort Study of Evolving Hypothalamic Dysfunction in Infants and Young Children (<3 years) with Optic Pathway Gliomas
Source: MDPI journal article supplement (doi:10.3390/cancers14030747), 2022-01-31
Supplement: s1 [file s1]

## Supplementary Materials:

**Supplementary Table S1.** Demographic and endo-metabolic data in patients presenting with diencephalic syndrome vs those without diencephalic syndrome.

| Factors and categories                    | Diencephalic Syndrome          |                               | <i>p</i> value |
|-------------------------------------------|--------------------------------|-------------------------------|----------------|
|                                           | Yes<br>n=27                    | No<br>n=63                    |                |
| AT DIAGNOSIS                              |                                |                               |                |
| Gender male                               | 10 (37.0)                      | 32 (50.8)                     | 0.231          |
| Age (years)                               | 0.84 [0.50 – 1.90] (0.25-2.90) | 2.00[1.20 – 2.60] (0.06-3.00) | <0.0001        |
| Age ≤1 year                               | 18 (66.7)                      | 12 (19)                       | <0.0001        |
| NF1                                       | 1 (3.7)                        | 26 (41.3)                     | <0.0001        |
| Radiological Classification               |                                |                               |                |
| MDC 1                                     | 0 (0)                          | 19 (30.2)                     | 0.001          |
| MDC 2                                     | 4 (14.8)                       | 21 (33.3)                     | 0.072          |
| MDC 3/4                                   | 23 (85.2)                      | 23 (36.5)                     | <0.0001        |
| Hypothalamic involvement                  | 27 (100)                       | 29 (46)                       | <0.0001        |
| Leptomeningeal Metastases                 | 9 (33.3)                       | 2 (3.2)                       | <0.0001        |
| Visual symptoms at diagnosis              | 12 (44.4)                      | 29 (46)                       | 0.890          |
| Raised intracranial pressure at diagnosis | 10 (37)                        | 12 (19)                       | 0.069          |
| AT LATEST FOLLOW UP                       |                                |                               |                |
| Presence of endo-metabolic disorders      | 23 (85.2)                      | 29 (46)                       | 0.001          |
| M-EMS(score 0-10)                         | 2 [1 – 5] (0 – 7)              | 0 [0 – 3] (0 – 7)             | 0.002          |
| APD                                       | 21 (77.8)                      | 26 (41.3)                     | 0.001          |
| GHD*                                      | 16 (59.3)                      | 21 (33.3)                     | 0.022          |
| TSHD*                                     | 11 (40.7)                      | 10 (15.9)                     | 0.011          |
| ACTHD*                                    | 9 (33.3)                       | 10 (15.9)                     | 0.063          |
| CPP*                                      | 14 (51.9)                      | 10 (15.9)                     | <0.0001        |
| GnD*                                      | 8 (29.6)                       | 9 (14.3)                      | 0.088          |
| PPD                                       | 6 (22.2)                       | 9 (14.3)                      | 0.355          |
| CDI*                                      | 2 (7.4)                        | 6 (9.5)                       | 1.000          |
| SIADH*                                    | 4 (14.8)                       | 6 (9.5)                       | 0.479          |
| CSWS*                                     | 1 (3.7)                        | 0 (0)                         |                |
| MD                                        | 11 (40.7)                      | 12 (19)                       | 0.031          |
| Obesity*                                  | 11 (40.7)                      | 12 (19)                       | 0.031          |
| IGT/T2DM*                                 | 4 (14.8)                       | 7 (11.1)                      | 0.623          |
| Follow-up time (years)                    | 9.3 [3.6 – 15] (1.13-21.74)    | 9.9 [4 – 11.9] (0.52-25)      | 0.812          |
| Deceased                                  | 5 (18.5)                       | 4 (6.3)                       | 0.121          |

Categorical variables are reported as number and percentage. Continuous nonparametric variables are presented as median [interquartile range] (range).

\*Items of the Modified Endocrine Morbidity Score (M-EMS)

M-EMS: Modified Endocrine Morbidity Score; APD: Anterior Pituitary Dysfunction; GHD; Growth Hormone Deficiency; TSHD: TSH Deficiency; ACTHD: ACTH Deficiency; CPP: Central Precocious Puberty; GnD: Gonadotropin Deficiency; PPD: Posterior Pituitary Dysfunction; CDI: Central Diabetes Insipidus;

---

SIADH: Syndrome of Inappropriate Secretion for ADH; CSWS: Cerebral Salt Wasting Syndrome; IGT: Impaired Glucose Tolerance, T2DM: Type 2 Diabetes Mellitus.
