# Supplementary figures and images for: A 40-Year Cohort Study of Evolving Hypothalamic Dysfunction in Infants and Young Children (<3 years) with Optic Pathway Gliomas
Source: MDPI journal article supplement (doi:10.3390/cancers14030747), 2022-01-31

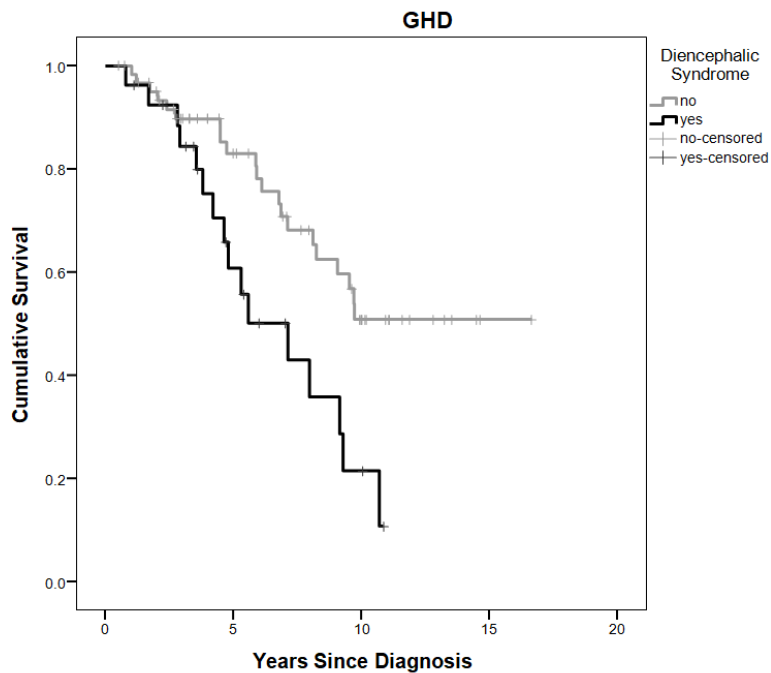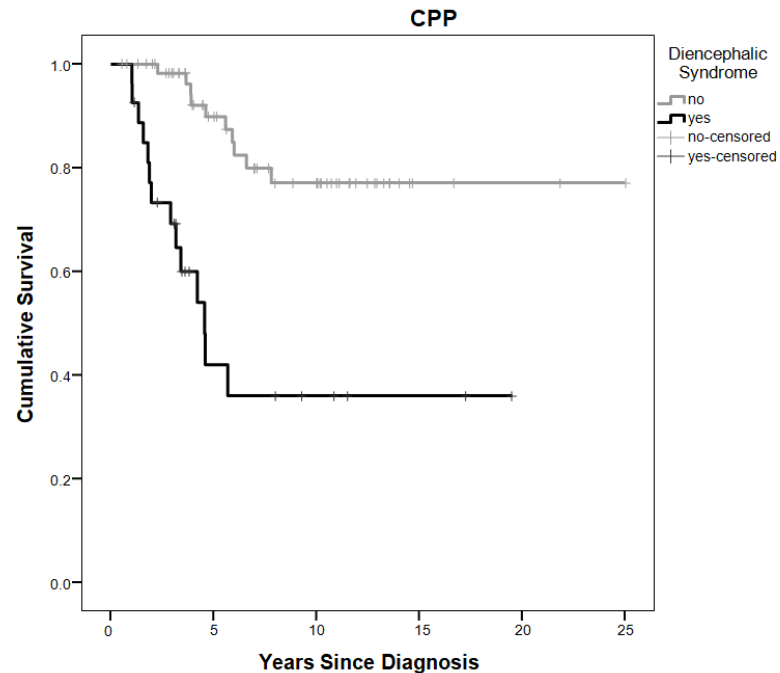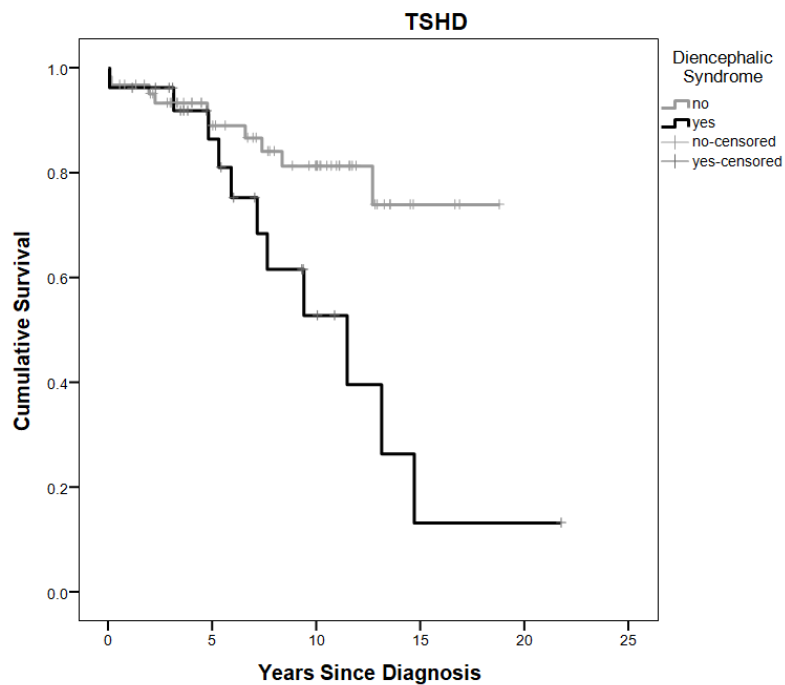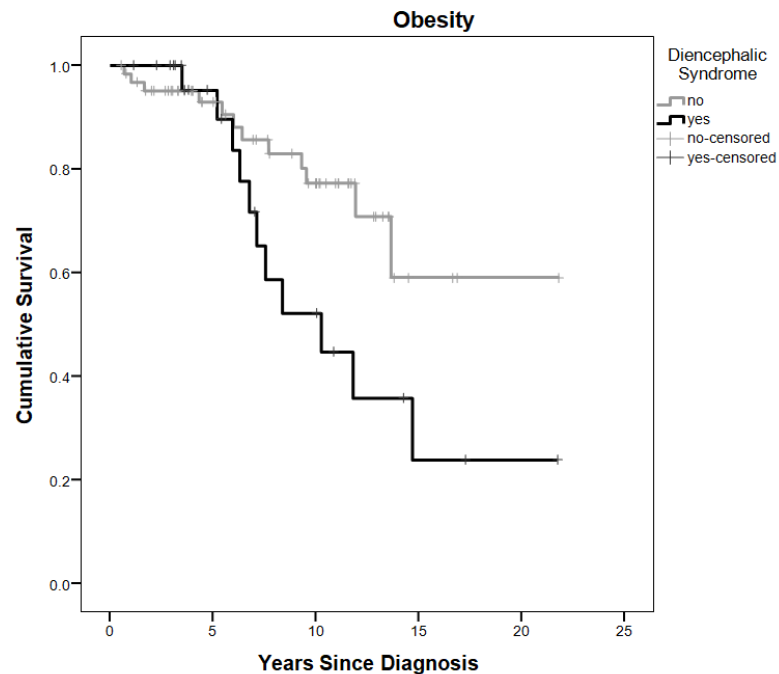

Supplement: s1 [file s1]
